# Supplementary material for: Resolving the origins of secretory products and anthelmintic responses in a human parasitic nematode at single-cell resolution
Source: eLife journal article supplement (doi:10.7554/elife.83100), 2023-06-15

GO Term

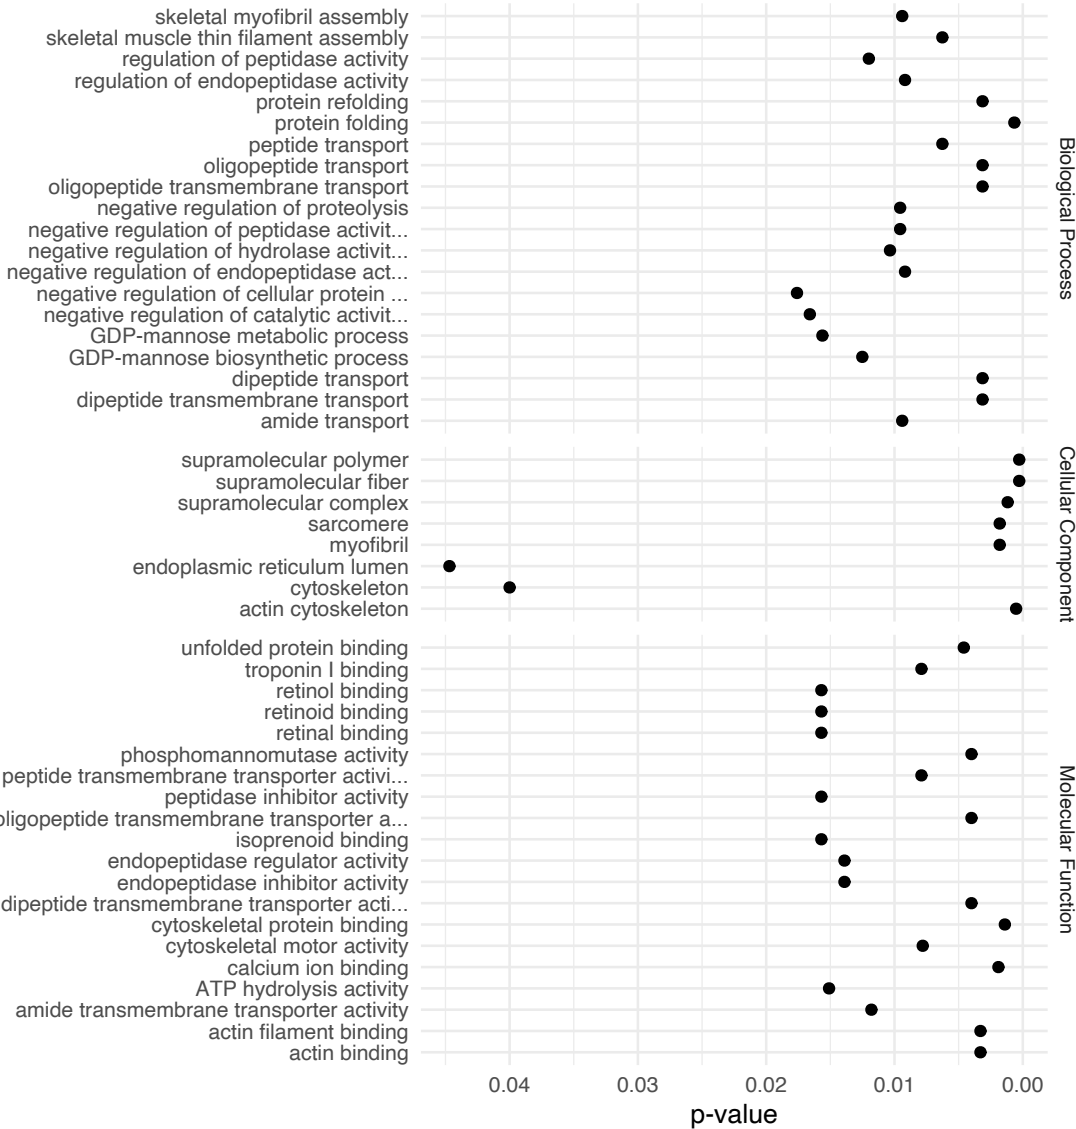

Supplement: supp [file elife-83100-supp-v1.zip]
